# Supplementary material for: Conducting polymer films and bioelectrodes combining high adhesion and electro-mechanical self-healing
Source: Royal Society of Chemistry journal article supplement (doi:10.1039/d3tc04230h), 2023-12-13
Supplement: d3tc04230h1.pdf [file d3tc04230h1.pdf]

## **Conducting Polymer Films and Bioelectrodes Combining High Adhesion and Electro-Mechanical Self-Healing**

Xin Zhou,<sup>a</sup> Pierre Kateb,<sup>a</sup> Jiaxin Fan,<sup>a</sup> Jinsil Kim,<sup>a</sup> Gregory A. Lodygensky,<sup>b</sup> Bénédicte Amilhon,<sup>b,c</sup> Damiano Pasini,<sup>d</sup> and Fabio Cicoira<sup>\*a</sup>

<sup>a</sup> Department of Chemical Engineering, Polytechnique Montréal, Montréal, QC H3C 3A7, Canada

<sup>b</sup> CHU Sainte-Justine Hospital Research Center, Montréal, QC H3T 1C5, Canada

<sup>c</sup> Département de Neurosciences, Université de Montréal, Montréal, QC H3T 1J4, Canada

<sup>d</sup> Department of Mechanical Engineering, McGill University, Montreal, QC H3A 0C3, Canada

\*Corresponding author. E-mail: fabio.cicoira@polymtl.ca

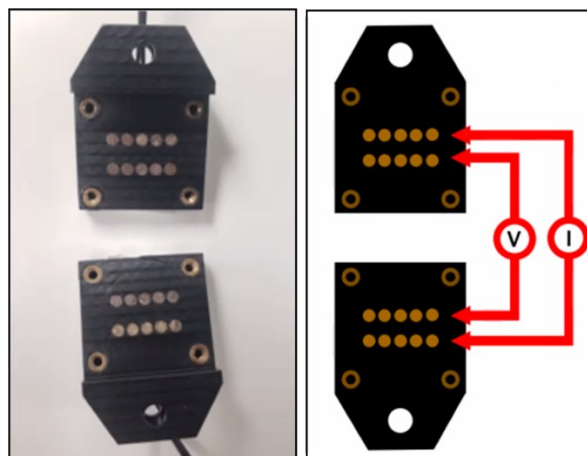

**Fig. S1** The 4-points probe electrical tensile grips used in this study.

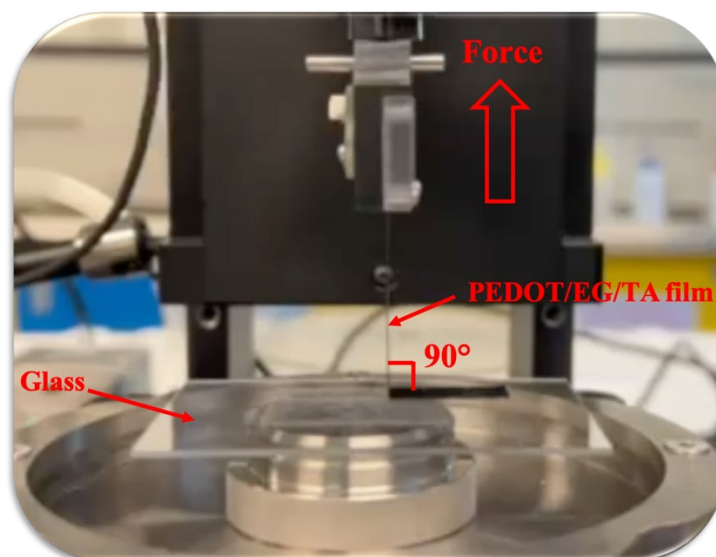

**Fig. S2** 90° peel-off testing configuration. The test involves peeling PEDOT/EG/TA films away from substrates (glass and porcine skin) at a 90-degree angle, forming a T-shape.

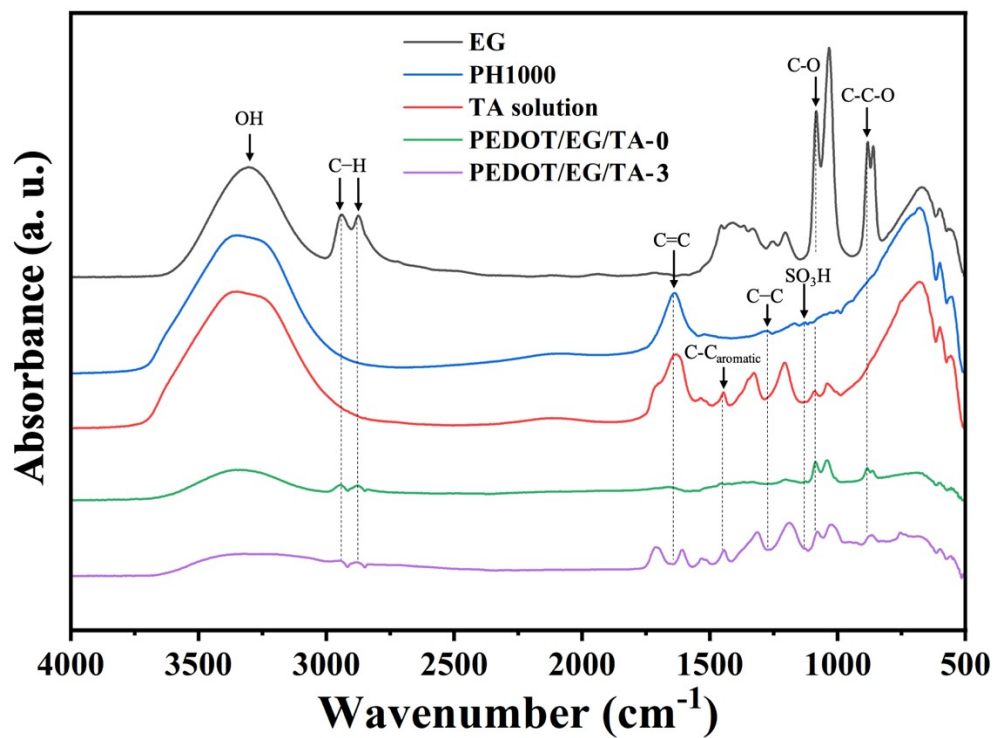

**Fig. S3** FTIR spectrum of PEDOT/EG/TA films, EG, TA aqueous solution (0.12 g/mL), and PEDOT:PSS aqueous solution (PH1000).

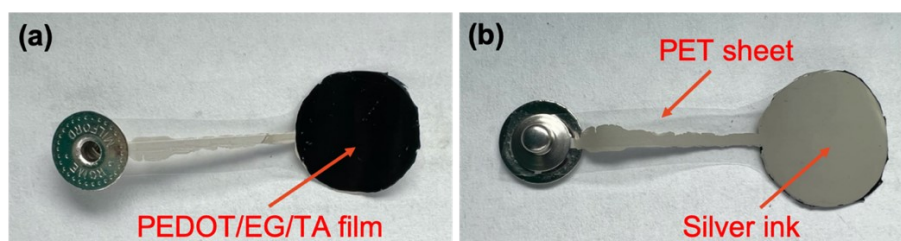

**Fig. S4** PEDOT/EG/TA film electrodes. Front (a) and back view (b).

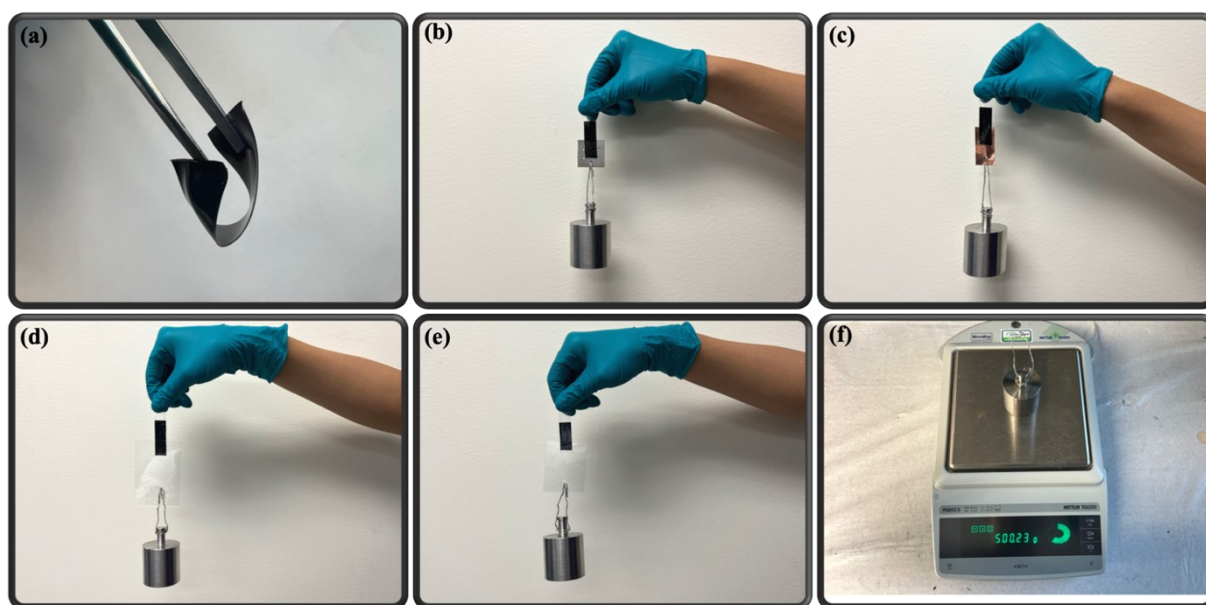

**Fig. S5** Digital images. (a) Freestanding PEDOT/EG/TA-3 film adhering to tweezers. PEDOT/EG/TA-3 film adhering to various materials: (b) stainless steel, (c) copper, (d) glass, and (e) plastic PET sheet. (f) A weight of 500 g.

**Table S1** Electrical tensile resistance change ( $R/R_0$ ) of PEDOT/EG/TA films at 30% strain and break. Data for  $R/R_0$  ( $n=3$ ) are reported as the mean  $\pm$  standard deviation.  $R$  and  $R_0$  are the resistance at a strain and initial strain (0%), respectively.

| Samples       | $R/R_0$           |                   |
|---------------|-------------------|-------------------|
|               | at 30% strain     | at break          |
| PEDOT/EG/TA-0 | $1.022 \pm 0.004$ | $1.060 \pm 0.013$ |
| PEDOT/EG/TA-1 | $1.027 \pm 0.004$ | $1.123 \pm 0.007$ |
| PEDOT/EG/TA-2 | $1.012 \pm 0.002$ | $1.161 \pm 0.016$ |
| PEDOT/EG/TA-3 | $1.016 \pm 0.003$ | $1.235 \pm 0.018$ |

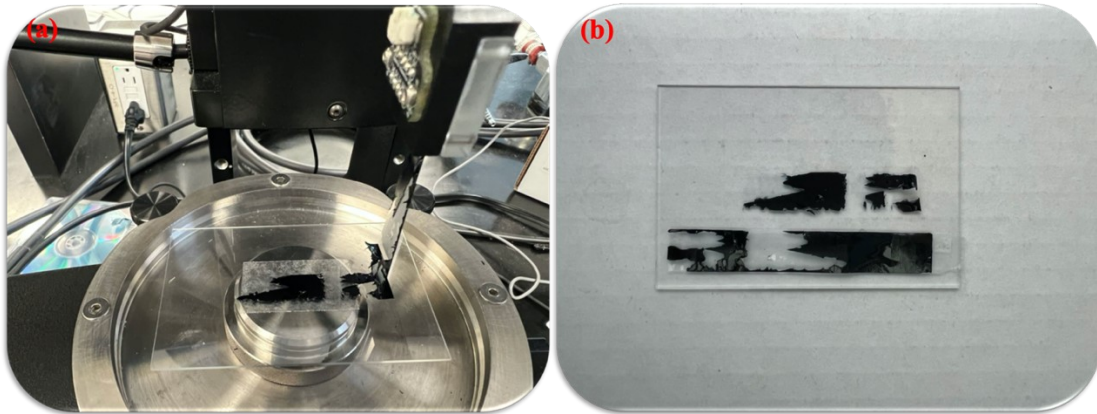

**Fig. S6** PEDOT/EG/TA-3 film broke during 90° peeling off test. (a) 90° peeling off testing process and (b) the broken PEDOT/EG/TA-3 film on the glass.

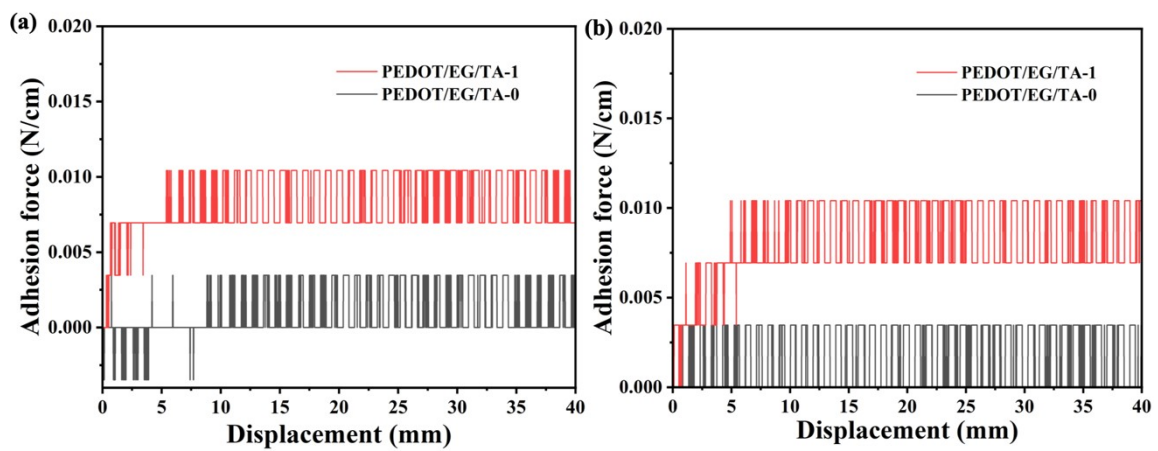

**Fig. S7** 90° peeling-off measurements of PEDOT/EG/TA films. Force versus displacement of PEDOT/EG/TA-1 and PEDOT/EG/TA-0 films on the glass (a) and on the pigskin (b).

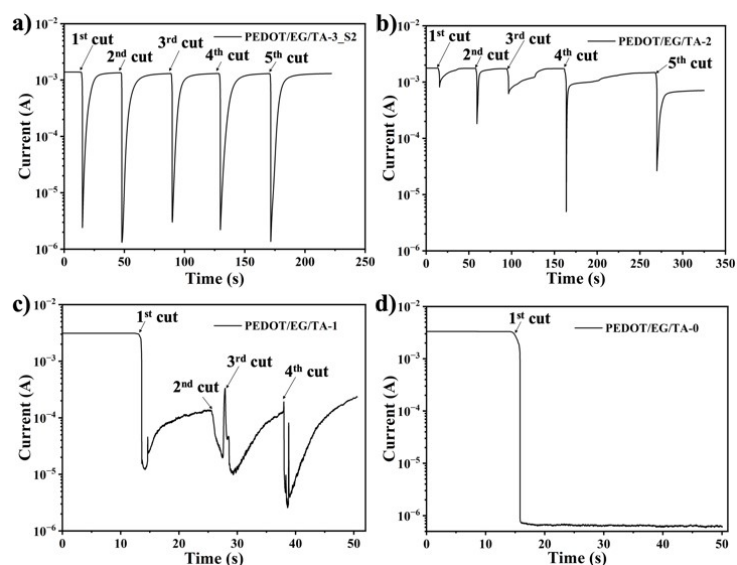

**Fig. S8** Electrical autonomous healing properties of PEDOT/EG/TA films. Current versus time measurements of a) PEDOT/EG/TA-3 (sample 2), b) PEDOT/EG/TA-2, c) PEDOT/EG/TA-1, and d) PEDOT/EG/TA-0 films under a constant voltage of 0.02 V upon various cutting cycles. For PEDOT/EG/TA-1 sample, since the film had relatively low adhesion and self-healing properties and the current was very low after the 1<sup>st</sup> complete cut, there were more noises observed for the consecutive cuts.

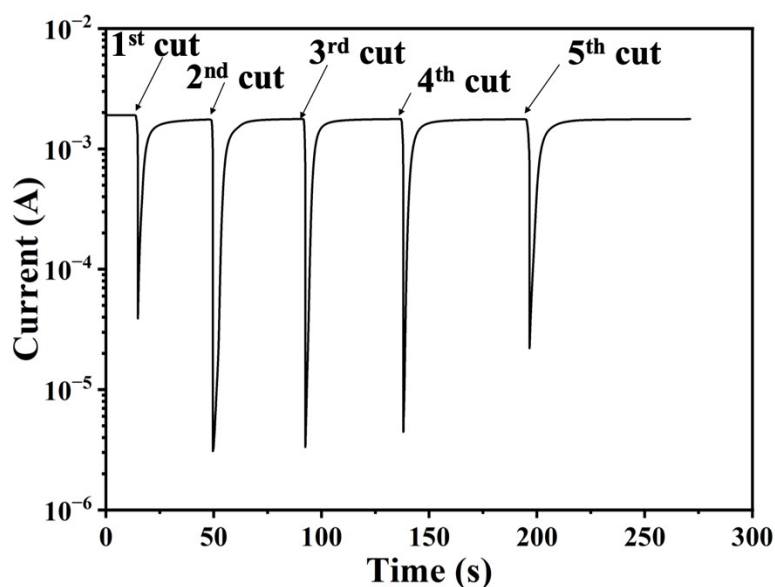

**Fig. S9** a) Electrical autonomous healing process of PEDOT/EG/TA-3 films stored in a fridge for 21 days: current versus time measurements were performed under a constant voltage of 0.02 V upon various cutting-healing cycles.

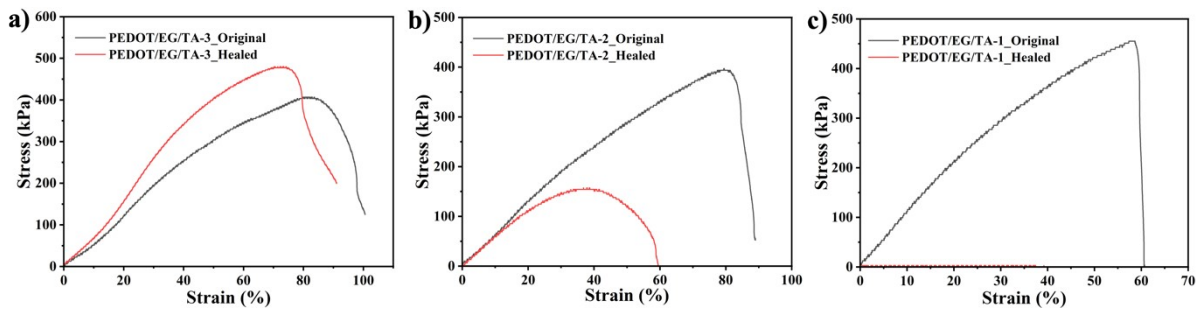

**Fig. S10** Mechanical cut-stick healing process: tensile stress-strain plots of original and cut-stick healing of a) PEDOT/EG/TA-3 (sample 2), b) PEDOT/EG/TA-2, and c) PEDOT/EG/TA-1 films. The stress was calculated based on the thickness of nonoverlap area.

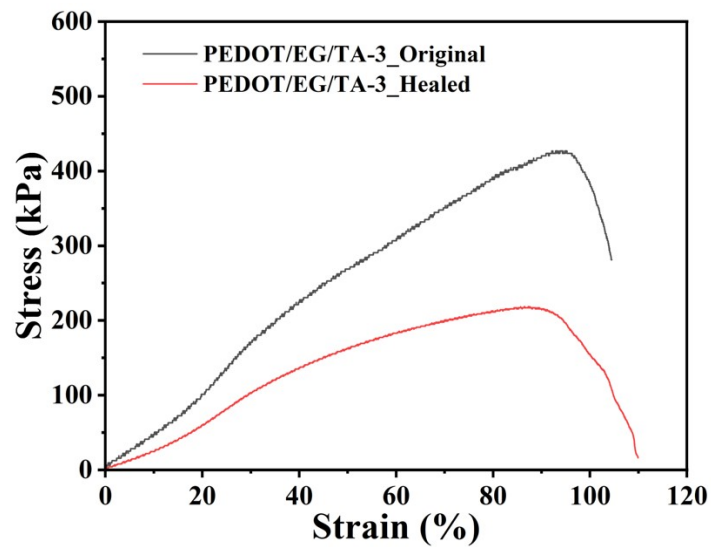

**Fig. S11** Mechanical cut-stick healing process: tensile stress-strain plots of original and cut-stick healing of PEDOT/EG/TA-3 film. The stress was calculated based on the thickness of overlap area.

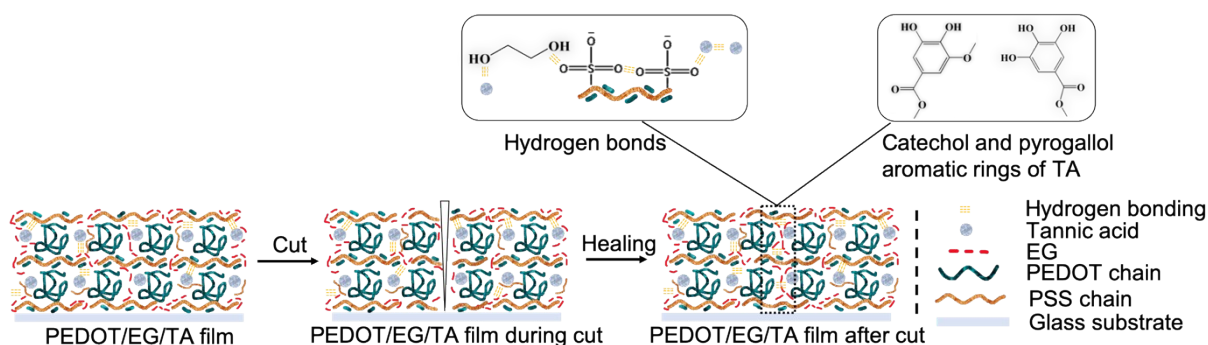

**Fig. S12** Scheme of the proposed mechanism for the autonomous and cut-stick healing of PEDOT/EG/TA films.

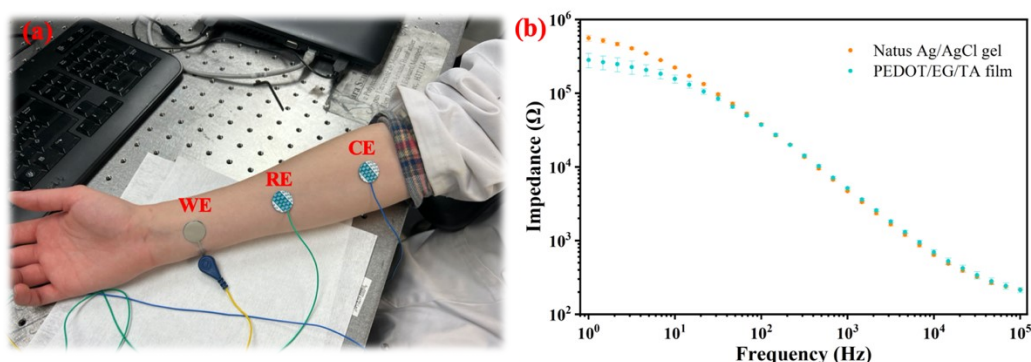

**Fig. S13** Characterization of skin-electrode impedance. (a) Configuration of the skin-electrode impedance measurements of a volunteer. The electrode under test acted as the working electrode (WE), and commercial Ag/AgCl gel disk electrodes (Natus®) were used as the reference (RE) and counter (CE) electrodes. (b) Skin-electrode impedance versus frequency for PEDOT/EG/TA-3 film and commercial Natus® Ag/AgCl gel electrodes. Each electrode has a diameter of 18 mm. Measurements were performed on the same people, locations, and on the same day. Data for skin-electrode impedance are reported as mean  $\pm$  standard deviation ( $n = 3$ ).



**Table S2** Comparison of skin-electrode impedance of Natus and PEDOT/EG/TA-3 film electrodes. Data for the impedance (n = 3) are reported as the mean  $\pm$  standard deviation.

| Frequency<br>(Hz) | Impedance (K $\Omega$ ) |                     |
|-------------------|-------------------------|---------------------|
|                   | Natus                   | PEDOT/EG/TA-3 films |
| 1                 | 558 $\pm$ 51            | 282 $\pm$ 61        |
| 10                | 223 $\pm$ 5             | 157 $\pm$ 20        |
| 100               | 38 $\pm$ 2              | 37 $\pm$ 1          |

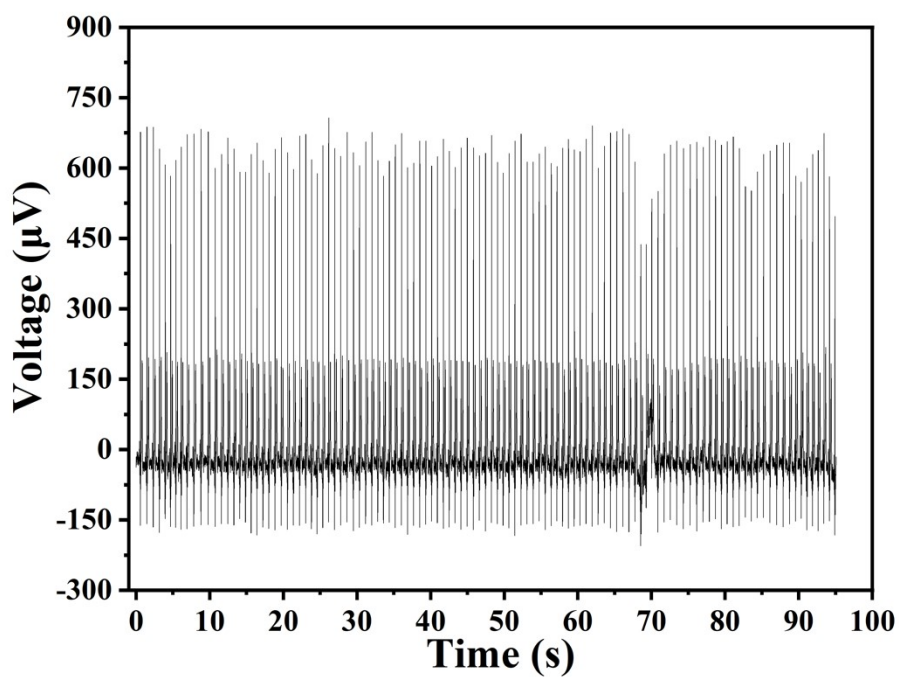

Fig. S14 ECG biopotentials (voltage versus time) recording with using PEDOT/EG/TA-3 film electrodes for over 90 seconds.

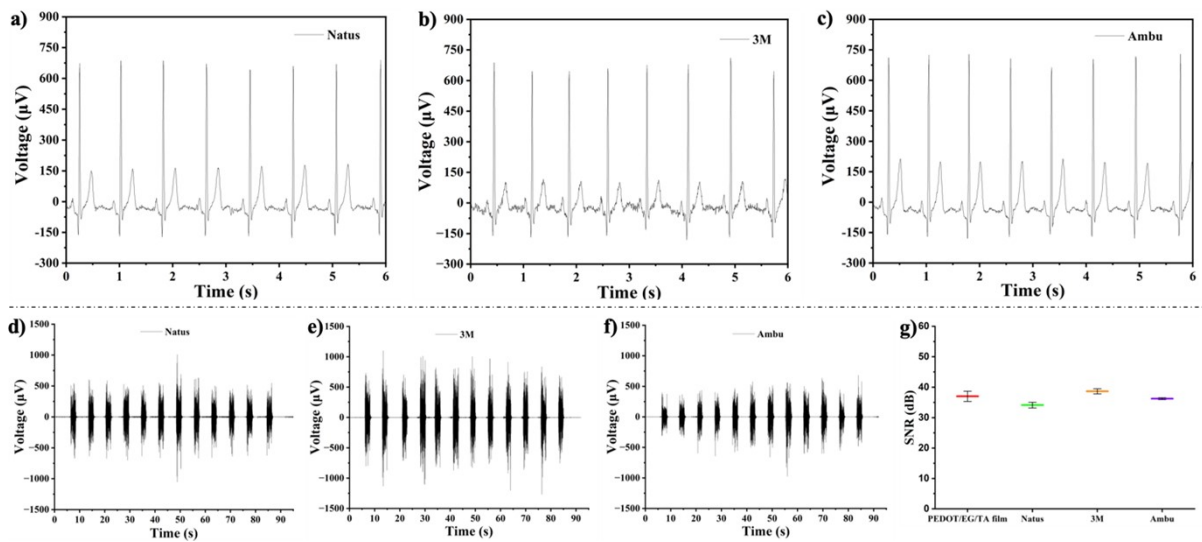

**Fig. S15** ECG and EMG signal recordings for different commercial Ag/AgCl gel electrodes. ECG biopotentials (voltage versus time) were recorded using commercial Natus<sup>®</sup> (a), 3M<sup>®</sup> (b), and Ambu<sup>®</sup> (c) Ag/AgCl gel electrodes. EMG monitoring using commercial Natus<sup>®</sup> (d), 3M<sup>®</sup> (e), and Ambu<sup>®</sup> (f) Ag/AgCl gel electrodes during the relaxation and clenching phases. (g) Computed SNR values over the 90 s recording period for PEDOT/EG/TA film electrodes and three different commercial Ag/AgCl gel electrodes. SNR data are reported as mean  $\pm$  standard deviation ( $n = 3$ ).
